# Supplementary material for: Evaluation of Survival Following Surgical Resection for Small Nonfunctional Pancreatic Neuroendocrine Tumors
Source: PubMed Central journal article supplement (PMC10051047; doi:10.1001/jamanetworkopen.2023.4096), 2023-03-28
Supplement: jamanetwopen-e234096-s001.pdf [file jamanetwopen-e234096-s001.pdf]

## Supplemental Online Content

Sugawara T, Rodriguez Franco S, Kirsh MJ, et al. Evaluation of survival following surgical resection for small nonfunctional pancreatic neuroendocrine tumors. *JAMA Netw Open*. 2023;6(3):e234096. doi:10.1001/jamanetworkopen.2023.4096

**eTable 1.** ICD-10 Codes Used for Identifying PanNENs

**eTable 2.** Baseline Variables of Patients With PanNENs by Tumor Size

**eFigure.** Kaplan-Meier Curves of Overall Survival Stratified by Tumor Sizes of Pancreatic Neuroendocrine Neoplasms

**eTable 3.** Baseline Variables of Patients With Nonfunctional PanNETs (cM0) by Tumor Size

**eTable 4.** Multivariate Cox Regression Model in Patients With Resected Small Nonfunctional PanNETs (cM0)

This supplemental material has been provided by the authors to give readers additional information about their work.

**eTable 1. ICD-10 Codes Used for Identifying PanNENs**

| ICD-10 code                   | Guide                                                |
|-------------------------------|------------------------------------------------------|
| ICD-10-CM                     |                                                      |
| C25.0                         | Malignant neoplasm of head of pancreas               |
| C25.1                         | Malignant neoplasm of body of pancreas               |
| C25.2                         | Malignant neoplasm of tail of pancreas               |
| C25.3                         | Malignant neoplasm of pancreatic duct                |
| C25.4                         | Malignant neoplasm of endocrine pancreas             |
| C25.7                         | Malignant neoplasm of other parts of pancreas        |
| C25.8                         | Malignant neoplasm of overlapping sites of pancreas  |
| C25.9                         | Malignant neoplasm of pancreas, unspecified          |
| ICD-O 3 <sup>rd</sup> edition |                                                      |
| 8013                          | Large cell neuroendocrine carcinoma                  |
| 8041                          | Small cell neuroendocrine carcinoma                  |
| 8150                          | Islet cell tumor (NOS)                               |
| 8151                          | Beta cell tumor (insulinoma)                         |
| 8152                          | Alpha cell tumor (glucagonoma)                       |
| 8153                          | Gastrin cell tumor (gastrinoma)                      |
| 8154                          | Mixed endo/exocrine tumor                            |
| 8155                          | VIPoma                                               |
| 8156                          | Somatostatinoma                                      |
| 8158                          | Endocrine tumor NOS (ACTHoma)                        |
| 8240                          | Low grade (well-differentiated) neuroendocrine tumor |
| 8244                          | Adenoneuroendocrine carcinoma, mixed                 |
| 8246                          | Neuroendocrine tumor (NOS)                           |
| 8249                          | Moderate differentiated neuroendocrine tumor         |
| 8360                          | Endocrine adenoma                                    |
| 8574                          | Adenocarcinoma with neuroendocrine differentiation   |

Abbreviations: ICD, international Classification of Diseases; PanNENs, pancreatic neuroendocrine neoplasms; CM; clinical modification; ICD-O, ICD for oncology; NOS, not otherwise specified.

**eTable 2. Baseline Variables of Patients with PanNENs by Tumor size**

| Characteristic                                  | Tumor size, No. (%)   |                            |                            |                        |
|-------------------------------------------------|-----------------------|----------------------------|----------------------------|------------------------|
|                                                 | ≤ 1.0cm<br>(n = 2308) | 1.1 – 2.0 cm<br>(n = 5938) | 2.1 – 4.0 cm<br>(n = 9133) | > 4.0 cm<br>(n = 8684) |
| Median age (IQR) (years)                        | 62 (53 – 70)          | 62 (52 – 70)               | 62 (52 – 71)               | 61 (51 – 70)           |
| Sex                                             |                       |                            |                            |                        |
| Male                                            | 1030 (45)             | 3045 (51)                  | 5026 (55)                  | 5026 (58)              |
| Female                                          | 1278 (55)             | 2893 (49)                  | 4107 (45)                  | 3658 (42)              |
| Race/Ethnicity                                  |                       |                            |                            |                        |
| White                                           | 1758 (76)             | 4634 (78)                  | 7114 (78)                  | 6659 (77)              |
| Black                                           | 286 (12)              | 676 (11)                   | 1047 (11)                  | 1065 (12)              |
| Hispanic                                        | 128 (6)               | 288 (5)                    | 533 (6)                    | 531 (6)                |
| Asian                                           | 86 (4)                | 206 (4)                    | 250 (3)                    | 259 (3)                |
| American Indian or Alaska Native                | 5 (0)                 | 17 (0)                     | 30 (0)                     | 28 (0)                 |
| Other <sup>a</sup>                              | 23 (1)                | 51 (1)                     | 67 (1)                     | 58 (1)                 |
| Unknown                                         | 22 (1)                | 66 (1)                     | 92 (1)                     | 84 (1)                 |
| Primary site                                    |                       |                            |                            |                        |
| Head                                            | 497 (22)              | 1581 (27)                  | 3298 (36)                  | 2768 (32)              |
| Body                                            | 538 (23)              | 1080 (18)                  | 1371 (15)                  | 998 (12)               |
| Tail                                            | 777 (34)              | 2211 (37)                  | 2933 (32)                  | 2926 (34)              |
| Other <sup>b</sup>                              | 496 (21)              | 1066 (18)                  | 1531 (17)                  | 1992 (22)              |
| Synchronous metastasis                          |                       |                            |                            |                        |
| No                                              | 2171 (94)             | 5241 (88)                  | 6042 (66)                  | 4377 (50)              |
| Yes                                             | 128 (6)               | 678 (11)                   | 3069 (34)                  | 4287 (49)              |
| Missing                                         | 9 (0)                 | 19 (0)                     | 22 (0)                     | 20 (0)                 |
| Surgery                                         |                       |                            |                            |                        |
| No                                              | 733 (31)              | 1701 (29)                  | 3671 (40)                  | 4446 (51)              |
| Enucleation                                     | 178 (8)               | 393 (6)                    | 205 (2)                    | 88 (1)                 |
| Resection                                       | 1407 (61)             | 3844 (65)                  | 5257 (58)                  | 4150 (48)              |
| Chemotherapy                                    |                       |                            |                            |                        |
| No                                              | 2196 (95)             | 5454 (92)                  | 7038 (77)                  | 5582 (64)              |
| Single agent                                    | 28 (1)                | 136 (2)                    | 523 (6)                    | 773 (9)                |
| Multiple agents                                 | 46 (2)                | 206 (4)                    | 1207 (13)                  | 1871 (22)              |
| Yes (Unknown)                                   | 5 (0)                 | 26 (0)                     | 109 (1)                    | 198 (2)                |
| Missing                                         | 33 (1)                | 116 (2)                    | 256 (3)                    | 260 (3)                |
| Pathological lymph node metastasis <sup>c</sup> |                       |                            |                            |                        |
| Negative                                        | 1009 (67)             | 2647 (62)                  | 2902 (53)                  | 1883 (44)              |

|                                                       |                            |                     |                     |                    |
|-------------------------------------------------------|----------------------------|---------------------|---------------------|--------------------|
| Positive                                              | 122 (4)                    | 537 (13)            | 1855 (34)           | 1973 (47)          |
| Missing                                               | 454 (29)                   | 1053 (25)           | 705 (13)            | 382 (9)            |
|                                                       | <b>Tumor size, No. (%)</b> |                     |                     |                    |
|                                                       | <b>≤ 1.0cm</b>             | <b>1.1 – 2.0 cm</b> | <b>2.1 – 4.0 cm</b> | <b>&gt; 4.0 cm</b> |
| <b>Characteristic</b>                                 | <b>(n = 2308)</b>          | <b>(n = 5938)</b>   | <b>(n = 9133)</b>   | <b>(n = 8684)</b>  |
| Lymphovascular Invasion <sup>c</sup>                  |                            |                     |                     |                    |
| No                                                    | 1066 (67)                  | 2745 (65)           | 2402 (44)           | 1195 (28)          |
| Yes                                                   | 62 (4)                     | 487 (11)            | 1352 (25)           | 1454 (34)          |
| Missing                                               | 457 (29)                   | 1005 (24)           | 1708 (31)           | 1589 (38)          |
| Margin status <sup>c</sup>                            |                            |                     |                     |                    |
| R0                                                    | 1427 (90)                  | 3844 (91)           | 4777 (88)           | 3465 (82)          |
| R1                                                    | 65 (4)                     | 160 (4)             | 315 (6)             | 328 (8)            |
| R2                                                    | 3 (0)                      | 6 (0)               | 21 (0)              | 46 (1)             |
| Positive (NOS)                                        | 29 (2)                     | 101 (2)             | 175 (3)             | 252 (6)            |
| Missing                                               | 61 (4)                     | 126 (3)             | 174 (3)             | 147 (3)            |
| Histology                                             |                            |                     |                     |                    |
| Large cell NEC                                        | 2 (0)                      | 20 (0)              | 103 (1)             | 154 (2)            |
| Small cell NEC                                        | 9 (0)                      | 47 (1)              | 247 (3)             | 334 (4)            |
| Islet cell (NOS)                                      | 145 (6)                    | 441 (7)             | 644 (7)             | 697 (8)            |
| Insulinoma                                            | 22 (1)                     | 78 (1)              | 54 (1)              | 23 (0)             |
| Glucagonoma                                           | 4 (0)                      | 11 (0)              | 22 (0)              | 28 (0)             |
| Gastrinoma                                            | 7 (0)                      | 26 (0)              | 50 (1)              | 34 (0)             |
| Mixed endo/exocrine tumor                             | 8 (0)                      | 56 (1)              | 168 (2)             | 174 (2)            |
| Vipoma                                                | 0 (1)                      | 2 (1)               | 3 (0)               | 12 (0)             |
| Somatostatinoma                                       | 1 (0)                      | 2 (0)               | 5 (0)               | 1 (0)              |
| Well differentiated NET                               | 1214 (53)                  | 2833 (48)           | 2861 (31)           | 1937 (22)          |
| NEN (NOS)                                             | 854 (37)                   | 2170 (37)           | 4385 (48)           | 4739 (55)          |
| Moderate differentiated NET                           | 41 (2)                     | 235 (4)             | 522 (6)             | 479 (6)            |
| Adenocarcinoma with<br>neuroendocrine differentiation | 1 (0)                      | 17 (0)              | 69 (1)              | 72 (1)             |
| Tumor differentiation                                 |                            |                     |                     |                    |
| Well                                                  | 1534 (66)                  | 3746 (63)           | 4061 (45)           | 3084 (36)          |
| Moderately                                            | 129 (6)                    | 626 (10)            | 1278 (14)           | 1334 (15)          |
| Poorly                                                | 17 (1)                     | 148 (3)             | 680 (7)             | 879 (10)           |
| Undifferentiated                                      | 4 (0)                      | 28 (1)              | 166 (2)             | 242 (3)            |
| Unknown                                               | 624 (27)                   | 1398 (23)           | 2948 (32)           | 3145 (36)          |

Abbreviations: PanNENs, pancreatic neuroendocrine neoplasms; IQR, interquartile range; NEC, neuroendocrine carcinoma; NOS, not otherwise specified; NET, neuroendocrine tumor; NEN, neuroendocrine neoplasm.

<sup>a</sup>Other includes Pacific Islander and NOS (not otherwise specified).

<sup>b</sup>Malignant neoplasms with ICD-10-CM codes as C25.3/C25.4/C25.7/C25.8/C25.9.

<sup>c</sup>Patients who underwent surgery.

---

**eFigure. Kaplan-Meier curves of overall survival stratified by tumor sizes of pancreatic neuroendocrine neoplasms.**

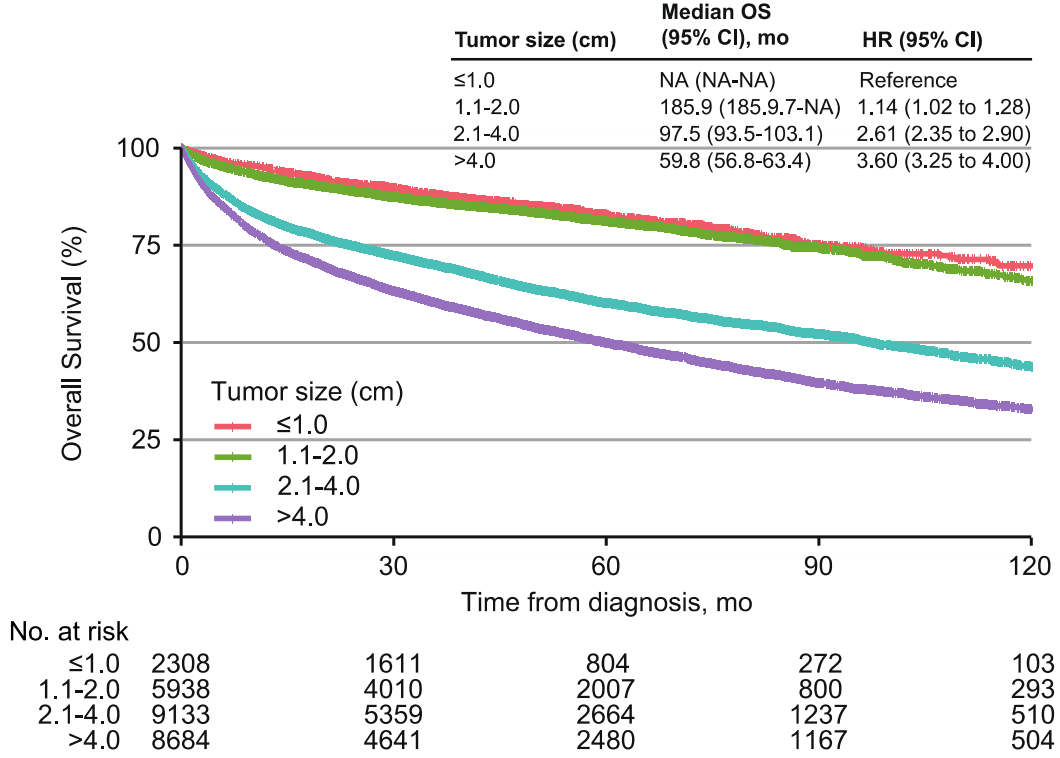

**eTable 3. Baseline Variables of Patients with Nonfunctional PanNETs (cM0) by Tumor size**

| Characteristic                                  | Tumor size, No. (%)   |                            |                            |                        |
|-------------------------------------------------|-----------------------|----------------------------|----------------------------|------------------------|
|                                                 | ≤ 1.0cm<br>(n = 1278) | 1.1 – 2.0 cm<br>(n = 3363) | 2.1 – 4.0 cm<br>(n = 3641) | > 4.0 cm<br>(n = 2222) |
| Median age (IQR) (years)                        | 62 (53 – 69)          | 62 (52 – 70)               | 61 (51 – 69)               | 61 (51 – 69)           |
| Sex                                             |                       |                            |                            |                        |
| Male                                            | 577 (45)              | 1761 (52)                  | 1996 (55)                  | 1184 (53)              |
| Female                                          | 701 (55)              | 1602 (48)                  | 1645 (45)                  | 1038 (47)              |
| Race/Ethnicity                                  |                       |                            |                            |                        |
| White                                           | 981 (77)              | 2612 (78)                  | 2800 (77)                  | 1677 (75)              |
| Black                                           | 154 (12)              | 362 (11)                   | 414 (11)                   | 299 (13)               |
| Hispanic                                        | 67 (5)                | 173 (5)                    | 235 (7)                    | 143 (6)                |
| Asian                                           | 54 (4)                | 137 (4)                    | 120 (3)                    | 60 (3)                 |
| American Indian or Alaska Native                | 2 (0)                 | 12 (0)                     | 10 (0)                     | 10 (1)                 |
| Other <sup>a</sup>                              | 12 (1)                | 33 (1)                     | 28 (1)                     | 13 (1)                 |
| Unknown                                         | 8 (1)                 | 34 (1)                     | 34 (1)                     | 20 (1)                 |
| Primary site                                    |                       |                            |                            |                        |
| Head                                            | 321 (25)              | 965 (29)                   | 1356 (37)                  | 858 (39)               |
| Body                                            | 379 (30)              | 755 (22)                   | 692 (19)                   | 323 (14)               |
| Tail                                            | 578 (45)              | 1643 (49)                  | 1593 (44)                  | 1041 (47)              |
| Surgery                                         |                       |                            |                            |                        |
| No                                              | 230 (18)              | 437 (13)                   | 325 (9)                    | 280 (13)               |
| Enucleation                                     | 103 (8)               | 245 (7)                    | 115 (3)                    | 29 (1)                 |
| Pancreatoduodenectomy                           | 282 (22)              | 828 (25)                   | 1251 (34)                  | 758 (34)               |
| Distal pancreatectomy                           | 581 (45)              | 1610 (48)                  | 1594 (44)                  | 928 (42)               |
| Total pancreatectomy                            | 60 (5)                | 181 (5)                    | 265 (7)                    | 165 (7)                |
| Pancreatectomy (NOS)                            | 22 (2)                | 62 (2)                     | 91 (3)                     | 62 (3)                 |
| Chemotherapy                                    |                       |                            |                            |                        |
| No                                              | 1253 (98)             | 3278 (97)                  | 3462 (95)                  | 1978 (89)              |
| Single agent                                    | 10 (1)                | 21 (1)                     | 52 (2)                     | 67 (3)                 |
| Multiple agents                                 | 6 (0)                 | 12 (0)                     | 40 (1)                     | 113 (5)                |
| Yes (Unknown)                                   | 1 (0)                 | 3 (0)                      | 10 (0)                     | 10 (1)                 |
| Missing                                         | 8 (1)                 | 49 (2)                     | 77 (2)                     | 54 (2)                 |
| Pathological lymph node metastasis <sup>b</sup> |                       |                            |                            |                        |
| Negative                                        | 695 (66)              | 1961 (67)                  | 2017 (61)                  | 1036 (53)              |
| Positive                                        | 64 (6)                | 285 (10)                   | 880 (27)                   | 752 (39)               |

| Missing                              | 289 (28)                      | 680 (23)                           | 419 (12)                           | 154 (8)                           |
|--------------------------------------|-------------------------------|------------------------------------|------------------------------------|-----------------------------------|
|                                      | <b>Tumor size, No. (%)</b>    |                                    |                                    |                                   |
| <b>Characteristic</b>                | <b>≤ 1.0cm<br/>(n = 1278)</b> | <b>1.1 – 2.0 cm<br/>(n = 3363)</b> | <b>2.1 – 4.0 cm<br/>(n = 3641)</b> | <b>&gt; 4.0 cm<br/>(n = 2222)</b> |
| Lymphovascular Invasion <sup>b</sup> |                               |                                    |                                    |                                   |
| No                                   | 781 (74)                      | 2106 (72)                          | 1770 (54)                          | 739 (38)                          |
| Yes                                  | 40 (4)                        | 324 (11)                           | 803 (24)                           | 687 (35)                          |
| Missing                              | 227 (22)                      | 496 (17)                           | 736 (22)                           | 520 (27)                          |
| Margin status <sup>b</sup>           |                               |                                    |                                    |                                   |
| R0                                   | 959 (92)                      | 2718 (93)                          | 2990 (90)                          | 1713 (88)                         |
| R1                                   | 40 (4)                        | 91 (3)                             | 165 (5)                            | 105 (5)                           |
| R2                                   | 2 (0)                         | 2 (0)                              | 4 (0)                              | 11 (1)                            |
| Positive (NOS)                       | 15 (1)                        | 54 (2)                             | 74 (2)                             | 73 (4)                            |
| Missing                              | 32 (3)                        | 61 (2)                             | 83 (3)                             | 40 (2)                            |
| Histology                            |                               |                                    |                                    |                                   |
| Islet cell (NOS)                     | 62 (5)                        | 209 (6)                            | 232 (7)                            | 173 (8)                           |
| Well differentiated NET              | 776 (61)                      | 1946 (58)                          | 1760 (48)                          | 873 (39)                          |
| Moderate differentiated NET          | 17 (1)                        | 155 (5)                            | 301 (8)                            | 213 (10)                          |
| NEN (NOS)                            | 423 (33)                      | 1053 (31)                          | 1348 (37)                          | 963 (43)                          |
| Tumor differentiation                |                               |                                    |                                    |                                   |
| Well                                 | 1181 (92)                     | 2905 (86)                          | 2842 (78)                          | 1605 (72)                         |
| Moderately                           | 97 (8)                        | 458 (14)                           | 799 (22)                           | 617 (28)                          |

Abbreviations: IQR, interquartile range; PanNETs, pancreatic neuroendocrine tumors; NOS, not otherwise specified; NET, neuroendocrine tumor; NEN, neuroendocrine neoplasm.

<sup>a</sup>Other includes Pacific Islander and NOS (not otherwise specified).

<sup>b</sup>Patients who underwent surgery.



**eTable 4. Multivariate Cox Regression Model in Patients with Resected Small Nonfunctional PanNETs (cM0)**

| <b>Variable</b>                    | <b>HR (95% CI)</b> | <b>P value</b> |
|------------------------------------|--------------------|----------------|
| Age (years)                        | 1.05 (1.04-1.06)   | <.001          |
| Sex                                |                    | .03            |
| Male                               | 1 [Reference]      |                |
| Female                             | 0.79 (0.64-0.97)   |                |
| Facility                           |                    | .06            |
| Non-academic                       | 1 [Reference]      |                |
| Academic                           | 0.75 (0.59-0.95)   |                |
| Missing                            | 0.75 (0.30-1.85)   |                |
| Charlson-Deyo Score                |                    | <.001          |
| 0                                  | 1 [Reference]      |                |
| 1                                  | 1.23 (0.96-1.56)   |                |
| 2-3                                | 1.96 (1.42-2.70)   |                |
| Primary site                       |                    | .06            |
| Head                               | 1 [Reference]      |                |
| Body                               | 0.70 (0.51-0.95)   |                |
| Tail                               | 0.80 (0.62-1.02)   |                |
| Pathological T stage <sup>a</sup>  |                    | .32            |
| pT0                                | 1.26 (0.17-9.32)   |                |
| pT1                                | 1 [Reference]      |                |
| pT2                                | 0.66 (0.16-2.68)   |                |
| pT3                                | 1.15 (0.77-1.70)   |                |
| pT4                                | 0.74 (0.10-5.45)   |                |
| Missing                            | 1.49 (1.05-2.12)   |                |
| Pathological lymph node metastasis |                    | .43            |
| Negative                           | 1 [Reference]      |                |
| Positive                           | 1.28 (0.88-1.85)   |                |
| Missing                            | 1.03 (0.80-1.33)   |                |
| Lymphovascular invasion            |                    | .75            |
| No                                 | 1 [Reference]      |                |
| Yes                                | 0.85 (0.55-1.31)   |                |
| Missing                            | 1.01 (0.75-1.36)   |                |
| Margin status                      |                    | .33            |
| R0                                 | 1 [Reference]      |                |
| R1                                 | 1.39 (0.82-2.36)   |                |

| R2                          | 4.35 (0.60-31.80)  |                |
|-----------------------------|--------------------|----------------|
| Positive (NOS)              | 1.06 (0.43-2.61)   |                |
| Missing                     | 1.44 (0.77-2.69)   |                |
| <b>Variable</b>             | <b>HR (95% CI)</b> | <b>P value</b> |
| Histology                   |                    | .13            |
| Islet cell (NOS)            | 0.87 (0.57-1.34)   |                |
| Well differentiated NET     | 1 [Reference]      |                |
| Moderate differentiated NET | 0.20 (0.05-0.82)   |                |
| NEN (NOS)                   | 1.02 (0.81-1.28)   |                |
| Tumor differentiation       |                    | .81            |
| Well                        | 1 [Reference]      |                |
| Moderately                  | 1.05 (0.72-1.53)   |                |

Abbreviations: PanNETs, pancreatic neuroendocrine tumors; NOS, not otherwise specified.

<sup>a</sup> American Joint Committee on Cancer 6<sup>th</sup> and 7<sup>th</sup> ed.
