# Supplementary material for: Evaluation of Survival Following Surgical Resection for Small Nonfunctional Pancreatic Neuroendocrine Tumors
Source: PubMed Central journal article supplement (PMC10051047; doi:10.1001/jamanetworkopen.2023.4096), 2023-03-28
Supplement: jamanetwopen-e234096-s002.pdf [file jamanetwopen-e234096-s002.pdf]

## Data Sharing Statement

Sugawara. Evaluation of Survival Following Surgical Resection for Small Nonfunctional Pancreatic Neuroendocrine Tumors. *JAMA Netw Open*. Published March 28, 2023.  
doi:10.1001/jamanetworkopen.2023.4096

### Data

**Data available:** No
